# Supplementary material for: Actomyosin contractility drives apical polarization and membrane transport during tubulogenesis
Source: Research Square preprint supplement (doi:10.21203/rs.3.rs-7665826/v1), 2026-03-25
Supplement: Supplementary file 1 [file 775a0181c694423eb276920e.xlsx]

## Sheet: Sheet1
Supplementary Table 1: Summary of statistics
Fig.	Condition	n	Mean	SEM	Median	Q1	Q3	Statistical Test
1f	Control	25	411.144	15.1311	406.905	379.31	458.541	Welch's t-test
1f	pAB	26	7.49242	3.5996	0	0	5.77875	Control vs pAB | t=26.0, df= 26.7, p=1.8E-20
1g	Control	23	19.2395	0.260012	19.511	18.511	20.136	Welch's t-test
1g	pAB	28	8.43811	0.2323	8.336	7.43875	9.173	Control vs pAB | t=31.0, df=46.8, p=7.6E-33
1i	Control	58	1019.39	50.5569	1000.56	769.019	1341.63	Welch's t-test
1i	pAB	71	326.36	37.2662	263.199	46.6385	593.447	Control vs pAB | t=11.0, df=109.4, p=1.8E-19
1j	Control	50	19.4571	0.340302	19.7275	18.343	20.9255	Welch's t-test
1j	pAB	66	13.5978	0.272838	13.515	12.3315	15.1113	Control vs pAB | t=13.4, df=100.8, p=3.4E-24
2b	13h-aPKC	26	0.529533	0.0563662	0.487791	0.292527	0.66139	Mann-Whitney U test (Bonferroni corr.)
2b	15h-aPKC-Control	25	1.15143	0.0578949	1.17189	1.00118	1.32465	13h vs 15h Control | p=1.8E-07
2b	15h-aPKC-pAB	22	0.550038	0.046911	0.592052	0.403907	0.705584	15h Control vs pAB | p=1.1E-07
2d	Control-basal	23	1	0.0343974	0.959136	0.879437	1.0705	Mann-Whitney U test (Bonferroni corr.)
2d	UTKO1-basal	23	0.671233	0.0252552	0.662387	0.594213	0.736288	Control vs UTKO1 | p=3.6E-07
2d	H1152-basal	26	0.493399	0.0172536	0.477967	0.426001	0.553225	Control vs H1152 | p=7.6E-09
2d	Control-lateral	23	1	0.0298241	1.01645	0.928719	1.08474	Mann-Whitney U test (Bonferroni corr.)
2d	UTKO1-lateral	22	0.946993	0.0296804	0.895316	0.852042	0.973734	Control vs UTKO1 | p=0.29
2d	H1152-lateral	26	0.699392	0.0327942	0.654849	0.578622	0.785043	Control vs H1152 | p=4.3E-06
2e	Control	25	10.8666	0.339632	11.071	10.102	12.178	Mann-Whitney U test (Bonferroni corr.)
2e	H1152	25	8.28816	0.268815	8.304	7.335	9.011	Control vs UTKO1 | p=5.4E-08
2e	UTKO1	29	6.9109	0.229334	6.609	6.044	7.611	Control vs H1152 | p=3.2E-05
2g	Control	15	0.359205	0.0350955	0.289961	0.250376	0.441594	Mann-Whitney U test (Bonferroni corr.)
2g	UTKO1	17	0.363478	0.0388593	0.38765	0.21927	0.463086	Control vs UTKO1 | p=1.0
2g	H1152	16	0.204914	0.0160232	0.184458	0.169158	0.230636	Control vs H1152 | p=8.9E-04
3b	Control-basal	21	1	0.0397308	0.980469	0.885683	1.12951	Mann-Whitney U test
3b	UTKO1-basal	20	0.668662	0.0333086	0.682721	0.569362	0.741454	Control vs UTKO1 | p=2.8E-06
3b	Control-lateral	21	1	0.0637744	0.990969	0.82105	1.22434	Mann-Whitney U test
3b	UTKO1-lateral	20	0.988151	0.0515399	1.00457	0.867269	1.1134	Control vs UTKO1 | p=1.0
3e	Control	24	13.4198	0.171547	13.1875	12.8465	13.9265	Welch's t-test (Bonferroni corr.)
3e	UTKO1	27	11.5097	0.265165	11.697	10.55	12.3395	Control vs UTKO1 | t=6.0, df=43.6, p=8.8E-07
3e	pAB	24	11.8266	0.359665	11.478	10.49	12.836	Control vs pAB | t=4.0, df=32.9, p=1.0E-03
3f	Control	29	4.83714	0.155214	4.75	4.263	5.329	Welch's t-test (Bonferroni corr.)
3f	UTKO1	29	4.95976	0.208079	5.077	4.413	5.607	Control vs UTKO1 | t=-0.47, df=51.8, p=1.0
3f	pAB	28	8.946	0.352427	8.585	7.859	9.96475	Control vs pAB | t=-10.7, df=37.1, p=2.2E-12
3i	Control	21	17.7337	0.628467	17.652	15.084	19.95	Welch's t-test
3i	UTKO1	24	12.5979	0.347575	12.4835	12.045	13.7308	Control vs UTKO1 | t=7.1, df=31.5, p=4.4E-08
3j	Control	24	643.052	45.2148	679.971	517.961	783.465	Welch's t-test
3j	UTKO1	25	206.683	21.4928	192.815	123.177	256.708	Control vs UTKO1 | t=8.7, df=32.9, p=4.5E-10
4h	DMSO	44	0.00584838	0.000203498	0.00578958	0.00498444	0.00655995	Mann-Whitney U test (Bonferroni corr.)
4h	pAB	22	0.00252673	0.000284191	0.00218478	0.00163728	0.00285393	Control vs pAB | p=8.0E-09
4h	UTKO1	17	0.00240874	0.000246331	0.00244967	0.00149688	0.00321094	Control vs UTKO1 | p=1.0E-08
4i	DMSO	54	1.20854	0.0401577	1.15935	0.998794	1.35041	Mann-Whitney U test (Bonferroni corr.)
4i	pAB	39	0.487361	0.0478126	0.42023	0.256219	0.733339	Control vs pAB | p=1.2E-13
4i	UTKO1	34	0.520973	0.0462015	0.515411	0.288577	0.719277	Control vs UTKO1 p=2.7E-13
5c	Control-MO	36	0.00721272	0.000340146	0.00706223	0.00540398	0.00896806	Mann-Whitney U test
5c	ERM-MO	34	0.00686009	0.000458179	0.00591195	0.00514598	0.00831351	Control vs ERM MO | p=0.30
5d	Control-MO	47	1.1836	0.0699445	1.02518	0.830709	1.36262	Mann-Whitney U test
5d	ERM-MO	47	0.883774	0.0531366	0.801686	0.594852	1.02582	Control vs ERM MO | p=6.1E-04
5e	Control MO	15	1	0.077107	1.03044	0.719453	1.28302	Mann-Whitney U test
5e	ERM MO	22	0.477584	0.0449162	0.485553	0.335629	0.619161	Control vs ERM MO | p=1.0E-05
5f	Control-MO	43	0.119374	0.0302185	0.0912211	0.0186684	0.229816	Mann-Whitney U test
5f	ERM-MO	39	0.469789	0.0643672	0.482084	0.171368	0.789137	Control vs ERM MO p=2.2E-05
5h	WT	49	483.94	33.4202	483.576	314.097	642.451	Welch's t-test
5h	COL Disp	42	60.2632	16.0469	24.17	6.417	76.5858	WT vs Coll+Disp | t=11.4, df=68.4, p=1.6E-17
5j	WT	33	0.00665638	0.000226861	0.00645737	0.00577696	0.00766613	Mann-Whitney U test
5j	Col-Disp	27	0.00488426	0.000242089	0.00471167	0.00391654	0.00593291	WT vs Coll+Disp |p=1.3E-05
5k	WT	39	1.11847	0.0554583	1.09951	0.860594	1.29046	Mann-Whitney U test
5k	Col-Disp	35	0.811699	0.0718416	0.693205	0.526392	1.00759	WT vs Coll+Disp | p=4.3E-04
5l	WT	18	1	0.0625739	1.05228	0.801288	1.25661	Mann-Whitney U test
5l	Coll	17	0.490439	0.0561409	0.490586	0.268053	0.664772	WT vs Coll+Disp | p=2.2E-05
5m	Col-Disp	35	1.29828	0.109592	1.36842	0.817595	1.78947	Mann-Whitney U test
5m	WT	36	0.0826895	0.0305105	0.0959211	-0.0522447	0.210526	WT vs Coll+Disp | p=1.0E-11
S1b	Control	44	389.708	23.0925	359.298	271.019	511.254	Welch's t-test
S1b	H1152	79	83.7478	13.062	36.686	5.9025	108.948	Control vs H1152 | t=11.5, df=70.9, p=6.3E-18
S1c	Control	44	16.4322	0.247241	16.3	15.7263	17.2838	Welch's t-test
S1c	H1152	47	11.7002	0.304379	11.626	10.1985	12.796	Control vs H1152 | t=12.1, df=86.4, p=3.1E-20
S1e	Control	34	756.727	37.2413	753.774	614.203	910.297	Welch's t-test
S1e	H1152	48	445.639	33.6281	432.81	310.526	538.036	Control vs H1152 | t=6.2, df=74.1, p=2.9E-08
S1f	Control	33	17.2286	0.309479	17.228	16.398	18.271	Welch's t-test
S1f	H1152	46	14.7712	0.288003	14.5335	13.7043	15.9522	Control vs H1152 | t=5.8, df=72.6, p=1.5E-07
S2c	13h-Par3	19	0.51647	0.0510532	0.531593	0.321902	0.643446	Mann-Whitney U test (Bonferroni corr.)
S2c	15h-Control-Par3	21	1.10618	0.0646198	1.06082	0.828873	1.35906	13h vs 15h control | p=1.9E-06
S2c	15h-pAB-Par3	12	0.485137	0.0764055	0.442544	0.327987	0.606995	15h control vs 15h pAB | p=7.7E-05
S2c	13h-Par6	15	0.369054	0.0371776	0.378452	0.287289	0.434207	Mann-Whitney U test (Bonferroni corr.)
S2c	15h-Cont-Par6	13	0.953532	0.0859961	0.89963	0.809971	1.00408	13h vs 15h control | p=5.5E-05
S2c	15h-pAB-Par6	10	0.383463	0.0366154	0.354302	0.301059	0.446638	15h control vs 15h pAB | p=4.1E-04
S3a	BI-0uM	3	0.474604	0.0426475	0.447761	0.432836	0.50295	Welch's t-test (Bonferroni corr.)
S3a	BI-1uM	3	0.516606	0.0333181	0.533333	0.492857	0.548718	Control vs 1 uM | t=9.8, df=2.1, p=1.0
S3a	BI-10uM	3	0.496169	0.00690719	0.5	0.491379	0.502874	Control vs 10 uM | t=-0.49, df=2.1, p=1.0
S3a	BI-100uM	3	0.0539027	0.00649253	0.0495868	0.0475207	0.0581267	Control vs 100 uM | t=9.7, df=2.1, p=0.026
S3b	Control-basal	26	1	0.0456343	0.958746	0.851595	1.16631	Mann-Whitney U test
S3b	BI-basal	30	0.677876	0.0237563	0.674812	0.596724	0.748447	Control vs BI | p=1.5E-07
S3b	Control-lateral	26	1	0.0323444	0.961026	0.89905	1.05495	Mann-Whitney U test
S3b	BI-lateral	30	0.911447	0.0315102	0.918836	0.793454	1.01929	Control vs BI | p=0.14
S3c	BI	28	10.1124	0.213769	10.1268	9.02188	10.6256	Welch's t-test
S3c	Control	28	12.3173	0.267214	12.0357	11.2482	13.1563	Control vs BI | t=6.4, df=51.5, p=4.0E-08
S3f	Control-Par3	15	1.66227	0.202088	1.69907	0.873487	2.37907	Mann-Whitney U test
S3f	BI-Par3	15	1.42881	0.114958	1.4522	1.22411	1.71074	Control vs BI | p=0.34
S3f	Control-Par6	18	1.55981	0.0982096	1.61951	1.32094	1.77728	Mann-Whitney U test
S3f	BI-Par6	18	1.34925	0.0622319	1.25026	1.17472	1.45062	Control vs BI | p=0.06
S3f	Control-aPKC	14	0.993484	0.0336936	1.02874	0.945629	1.05888	Mann-Whitney U test
S3f	BI-aPKC	14	1.17501	0.0889389	1.0941	0.978137	1.40998	Control vs BI | p=0.19
S4b	Control-basal	32	1	0.0456113	1.00569	0.852996	1.18243	Mann-Whitney U test (Bonferroni corr.)
S4b	BI-basal	32	0.605709	0.0244678	0.592295	0.534222	0.666522	Control vs BI | p=2.1E-08
S4b	H11-basal	31	0.474941	0.0184729	0.481596	0.428457	0.550885	Control vs H1152 | p=3.9E-10
S4b	Control-lateral	32	1	0.0325671	0.983556	0.867897	1.12492	Mann-Whitney U test (Bonferroni corr.)
S4b	BI-lateral	32	1.0464	0.0521558	1.03396	0.801227	1.23688	Control vs BI | p=1.0
S4b	H11-lateral	31	0.406008	0.0208	0.429082	0.318435	0.464179	Control vs H1152 | p=2.9E-11
S4d	Control	57	4.93098	0.100543	4.982	4.481	5.401	Welch's t-test (Bonferroni corr.)
S4d	BI2536	57	4.99916	0.121194	4.982	4.359	5.608	Control vs BI | t=-0.43, df=108.3, p=1.0
S4d	pAB	87	9.94885	0.26694	10.253	8.941	11.7515	Control vs pAB | t=-17.5, df=108.8, p=8.2E-33
S4d	H1152	75	9.15569	0.18203	9.217	8.2215	10.1805	Control vs H1152 | t=-20.3, df=112.2, p=1.3E-38
S4e	Control	51	13.7122	0.181651	13.706	12.871	14.4535	Welch's t-test (Bonferroni corr.)
S4e	BI2536	59	11.2628	0.157426	11.071	10.596	12.04	Control vs BI | t=10.1, df=103.1, p=1.7E-16
S4e	pAB	72	10.7483	0.163836	10.794	9.9645	11.6365	Control vs pAB | t=12.1, df=112.1, p=2.5E-21
S4e	H1152	65	10.8174	0.164308	10.991	9.963	11.64	Control vs H1152 | t=11.8, df=108.5, p=1.9E-20
S4g	Control	36	608.276	27.9901	602.245	524.068	705.508	Welch's t-test
S4g	BI	37	164.703	20.8056	140.032	66.526	246.912	Control vs BI | t=12.7, df=65.0, p=2.6E-19
S4h	Control	35	13.8924	0.239276	13.832	12.8826	14.8467	Welch's t-test
S4h	BI	36	10.8784	0.230096	10.8985	9.82922	11.6815	Control vs BI | t=9.1, df=68.8, p=2.2E-13
S6c	DMSO	44	0.00584838	0.000203498	0.00578958	0.00498444	0.00655995	Mann-Whitney U test
S6c	BI2536	10	0.00298604	0.00034383	0.00289862	0.00249231	0.00367042	Control vs BI | p=4.7E-06
S6d	DMSO	54	1.20854	0.0401577	1.15935	0.998794	1.35041	Mann-Whitney U test
S6d	BI2536	18	0.829863	0.0672565	0.830709	0.61308	0.915242	Control vs BI | p=1.8E-06
S7a	Control MO-basal	46	1	0.0333295	0.976918	0.831571	1.12808	Mann-Whitney U test
S7a	ERM MO-basal	39	0.707517	0.0256817	0.678012	0.566752	0.77046	Control vs ERM MO | p=9.2E-09
S7a	Control MO lateral	46	1	0.0301849	0.955031	0.870498	1.06954	Mann-Whitney U test
S7a	ERM MO lateral	39	0.963959	0.0356268	0.967324	0.837515	1.07382	Control vs ERM MO | p=0.56
S7b	Control MO	46	10.6536	0.143276	10.663	9.963	11.2573	Mann-Whitney U test
S7b	ERM MO	41	8.95951	0.203891	8.825	7.947	10.24	Control vs ERM MO | p=3.9E-08
S7c	Control MO	24	0.461108	0.0605336	0.407593	0.273515	0.604451	Mann-Whitney U test
S7c	ERM MO	27	0.524331	0.0495598	0.479853	0.402317	0.5901	Control vs ERM MO | p=0.25
S8b	Control-basal	31	1	0.0252144	1.01676	0.923162	1.09018	Mann-Whitney U test
S8b	Col-Disp-basal	34	1.0413	0.0304156	1.0287	0.911335	1.17577	Control vs Coll+Disp | p=0.44
S8b	Control-lateral	31	1	0.0329026	0.996226	0.83126	1.11864	Mann-Whitney U test
S8b	Col-Disp-lateral	34	0.962076	0.0289381	0.932226	0.858739	1.05412	Control vs Coll+Disp | p=0.44
S8c	Col-Disp	36	0.873137	0.0202353	0.870079	0.790719	0.970965	Mann-Whitney U test
S8c	Control	25	0.990221	0.0098136	0.989124	0.9686	1.01486	Control vs Coll+Disp | p=6.1E-05
